# Supplementary material for: Genome-wide identification of the YABBY gene family and functional characterization of TaYABBY4A in wheat (Triticum aestivum L.)
Source: Research Square preprint supplement (doi:10.21203/rs.3.rs-7691254/v1), 2025-10-16
Supplement: Supplementary file 1 [file 5f8d48b3578ccb4cea1d5a04.xlsx]

## Sheet: Sheet1
Table 3 Haplotype number of TaYABBYs
Gene ID	Variety			Geographical location distribution					Variety type
	Spelt	Cultivate	Landrace	Asia	Africa	Europe	N_America	S_America	Spring	Facultative	Winter
TaYABBY1A	2	1	3	3	1	3	2	1	3	3	3
TaYABBY1B	0	0	0	0	0	0	0	0	0	0	0
TaYABBY1D	10	3	8	23	3	10	1	2	17	2	10
TaYABBY2A	1	1	2	3	3	2	1	1	4	2	2
TaYABBY3A	0	0	0	0	0	0	0	0	0	0	0
TaYABBY2B	0	0	0	0	0	0	0	0	0	0	0
TaYABBY3B	11	7	14	26	4	17	4	2	16	4	19
TaYABBY2D	11	1	10	17	4	13	3	1	12	2	17
TaYABBY3D	9	2	6	14	3	8	2	1	10	2	10
TaYABBY4A	1	1	1	2	1	1	1	1	1	1	1
TaYABBY5B	12	6	15	31	5	19	3	2	22	5	19
TaYABBY5D	8	1	6	16	4	11	2	1	13	2	9
TaYABBY6A	0	0	0	0	0	0	0	0	0	0	0
TaYABBY7A	14	12	31	49	6	23	4	3	12	5	26
TaYABBY6B	12	7	22	32	5	19	2	3	26	4	24
TaYABBY7B	14	13	29	38	6	30	4	2	32	8	32
TaYABBY6D	10	1	5	16	4	11	2	1	12	3	9
TaYABBY7D	14	9	18	32	5	20	3	3	28	3	23
TaYABBY8A	14	8	15	30	5	18	4	2	25	4	22
TaYABBY8B	0	0	0	0	0	0	0	0	0	0	0
TaYABBY8D	0	0	0	0	0	0	0	0	0	0	0
