# Supplementary material for: Genome-wide identification of the YABBY gene family and functional characterization of TaYABBY4A in wheat (Triticum aestivum L.)
Source: Research Square preprint supplement (doi:10.21203/rs.3.rs-7691254/v1), 2025-10-16
Supplement: Supplementary file 2 [file a96ccb945e9977451d186df0.xlsx]

## Sheet: Sheet1
Table 1 Characteristics of YABBY gene family in wheat
Gene Name	Gene ID	Chromosome Location	Length of	Number of Amino Acid (aa)	Molecular Weight (kDa)	Theoretical pI	Subcellular Location
			CDS (bp)
TaYABBY1A	TraesCS1A03G0474700.1	Chr1A:316284558..316288434 reverse	894	297	31.4	8.62	Nucleus
TaYABBY1B	TraesCS1B03G0594600.1	Chr1B:373918767..373921912 forward	894	297	31.44	8.62	Nucleus
TaYABBY1D	TraesCS1D03G0420000.2	Chr1D:235923572..235927704 forward	891	296	31.28	8.62	Nucleus
TaYABBY2A	TraesCS2A03G0410600.1	Chr2A:171365221..171366194 reverse	501	166	17.85	5.62	Nucleus
TaYABBY3A	TraesCS2A03G0933800.1	Chr2A:635685520..635687828 reverse	789	262	28.47	8.14	Nucleus
TaYABBY2B	TraesCS2B03G0541000.1	Chr2B:222563599..222564584 reverse	507	168	18.1	5.64	Nucleus
TaYABBY3B	TraesCS2B03G1026400.1	Chr2B:579489091..579491067 reverse	846	281	30.22	6.81	Nucleus
TaYABBY2D	TraesCS2D03G0428800.1	Chr2D:159403202..159405202 reverse	495	164	17.76	5.92	Nucleus
TaYABBY3D	TraesCS2D03G0872700.1	Chr2D:489147737..489150241 reverse	810	269	28.96	6.74	Nucleus
TaYABBY4A	TraesCS4A03G0115300.3	Chr4A:51130057..51133943 forward	609	202	22.55	8.98	Nucleus
TaYABBY5B	TraesCS4B03G0667000.5	Chr4B:508185903..508189818 reverse	609	202	22.58	8.98	Nucleus
TaYABBY5D	TraesCS4D03G0590200.2	Chr4D:412600892..412604672 reverse	609	202	22.56	8.98	Nucleus
TaYABBY6A	TraesCS5A03G0062900.1	Chr5A:22922990..22928163 reverse	624	207	22.92	8.97	Nucleus
TaYABBY7A	TraesCS5A03G0893000.2	Chr5A:572262988..572273093 reverse	561	186	21.05	9.3	Nucleus
TaYABBY6B	TraesCS5B03G0058600.1	Chr5B:24225528..24230683 reverse	624	207	22.66	9.13	Nucleus
TaYABBY7B	TraesCS5B03G0939600.2	Chr5B:554622691..554629508 reverse	678	225	25.56	9.48	Nucleus
TaYABBY6D	TraesCS5D03G0084700.2	Chr5D:32648514..32653574 reverse	621	206	22.6	9.28	Nucleus
TaYABBY7D	TraesCS5D03G0855400.1	Chr5D:453985741..453993571 reverse	717	238	27.06	9.11	Nucleus
TaYABBY8A	TraesCS6A03G0650400.1	Chr6A:449354517..449357506 reverse	753	250	26.68	8.13	Nucleus
TaYABBY8B	TraesCS6B03G0777700.2	Chr6B:486983135..486986378 reverse	777	258	27.61	8.43	Nucleus
TaYABBY8D	TraesCS6D03G0540200.2	Chr6D:332137383..332140604 reverse	777	258	27.65	8.43	Nucleus
