# Supplementary material for: Genome-wide identification of the YABBY gene family and functional characterization of TaYABBY4A in wheat (Triticum aestivum L.)
Source: Research Square preprint supplement (doi:10.21203/rs.3.rs-7691254/v1), 2025-10-16
Supplement: Supplementary file 3 [file c4eb0433eab8dcfae76fea96.xlsx]

## Sheet: Sheet1
Table 2 Ka/Ks ratio and homology of homologous genes
Homologous genes		Ka	Ks	Ka/Ks	Homologous fragment length	Identities (%)
Gene1	Gene2
TaYABBY1A	TaYABBY1B	0.00906	0.05067	0.17873	894	0.98
TaYABBY1A	TaYABBY1D	0.00454	0.04592	0.09876	891	0.98
TaYABBY1B	TaYABBY1D	0.01063	0.05067	0.20968	891	0.98
TaYABBY2A	TaYABBY2B	0.03931	0.04753	0.82709	507	0.95
TaYABBY2A	TaYABBY2D	0.04255	0.1149	0.37035	495	0.93
TaYABBY2B	TaYABBY2D	0.01893	0.1097	0.17258	495	0.94
TaYABBY3A	TaYABBY3B	0.04181	0.10382	0.4027	846	0.98
TaYABBY3A	TaYABBY3D	0.04556	0.12315	0.36994	810	0.97
TaYABBY3B	TaYABBY3D	0.00325	0.07865	0.04134	810	0.98
TaYABBY4A	TaYABBY5B	0.00215	0.05143	0.04186	609	0.99
TaYABBY4A	TaYABBY5D	0.00215	0.05149	0.0418	609	0.99
TaYABBY5B	TaYABBY5D	0.00431	0.05914	0.07288	609	0.98
TaYABBY6A	TaYABBY6B	0.01909	0.14568	0.13103	624	0.96
TaYABBY6A	TaYABBY6D	0.01918	0.0891	0.2153	621	0.96
TaYABBY6B	TaYABBY6D	0.00635	0.14568	0.04358	621	0.96
TaYABBY6B	TaYABBY7B	0.19939	1.11645	0.17859	678	0.82
TaYABBY6B	TaYABBY7D	0.19971	1.37321	0.14543	717	0.81
TaYABBY7A	TaYABBY6B	0.20573	1.10609	0.18599	624	0.82
TaYABBY7A	TaYABBY7B	0	0.05023	0	678	0.99
TaYABBY7A	TaYABBY7D	0.0143	0.06674	0.21427	717	0.99
TaYABBY7B	TaYABBY7D	0.0143	0.06674	0.21427	717	0.99
TaYABBY8A	TaYABBY8B	0.00706	0.04568	0.15447	777	0.96
TaYABBY8A	TaYABBY8D	0.00528	0.03406	0.1551	777	0.96
TaYABBY8B	TaYABBY8D	0.00512	0.02188	0.23379	777	0.99
